# Supplementary material for: How does serif vs sans serif typeface impact the usability of e-commerce websites?
Source: PubMed Central journal article supplement (PMC9680897; doi:10.7717/peerj-cs.1139), 2022-11-18
Supplement: peerj-cs-08-1139-s002.pdf [file peerj-cs-08-1139-s002.pdf]

**I feel comfortable purchasing from the website \***

Strongly disagree                        Strongly agree  
1                      2                      3                      4                      5

**I feel confident conducting business on the website \***

Strongly disagree                        Strongly agree  
1                      2                      3                      4                      5

**How likely are you to recommend this website to a friend or colleague? \***

Not at all likely                                                Very likely  
0                      1                      2                      3                      4                      5                      6                      7                      8                      9                      10

**I will likely return to the website in the future \***

Strongly disagree                        Strongly agree  
1                      2                      3                      4                      5

**I find the website to be attractive \***

Strongly disagree                        Strongly agree  
1                      2                      3                      4                      5

**The website has a clean and simple presentation \***

Strongly disagree                        Strongly agree  
1                      2                      3                      4                      5

**It is easy to read the text on this website with the used font type \***

Strongly disagree                        Strongly agree  
1                      2                      3                      4                      5
